# Supplementary material for: Resistome of carbapenem- and colistin-resistant Klebsiella pneumoniae clinical isolates
Source: PLoS One. 2018 Jun 8;13(6):e0198526. doi: 10.1371/journal.pone.0198526 (PMC5993281; doi:10.1371/journal.pone.0198526)
Supplement: S1 Table — Susceptibility or resistance to colistin is indicated with S or R, respectively. The genome sequence for K. pneumoniae HS11286 was used as a reference (GenBank assembly accession GCA_000240185.2). (XLSX) [file pone.0198526.s001.xlsx]

## Sheet: Sheet1
Table - Modifications and amino acid alterations in different genes associated with colistin resistance. Susceptibility or resistance to colistin is indicated with S or R, respectively. The genome sequence for K. pneumoniae HS11286 was used as a reference (GenBank assembly accession GCA_000240185.2).
		ST	Colistin	mcr genes	mgrB	pmrA		pmrB														phoP	phoQ
BL49	CFSAN044563	ST11	R	absent	deletion			T93P		T112P	T127P	T128P										no changes	T244P
BU19801	CFSAN044564	ST307	R		ISKpn25 at mgrB23		A41T												L213M		R256G
MS84	CFSAN044565	ST15	R		IS5-like at mgrB38				N110T	T112P		T128P					L159P			A246T	R256G
BA3783	CFSAN044569	ST14	R		IS1-like at mgrB45															A246T	R256G
BA2664	CFSAN044571	ST11	R		intact											T157P
BL8800	CFSAN044572	ST101	R		intact	A217V										T157P					R256G
BA/BL2880	CFSAN044573	ST101	R		intact	A217V							L130P	L141P	V151G	T157P	L159P	L164P			R256G
BL13802	CFSAN044570	ST11	S		intact
BL12125	CFSAN044566	ST14	S		intact									L141P						A246T	R256G
BL12456	CFSAN044568	ST14	S		intact															A246T	R256G
									NEUTRAL IN PROVEAN
									DELETERIOUS IN PROVEAN
