# Supplementary material for: Resistome of carbapenem- and colistin-resistant Klebsiella pneumoniae clinical isolates
Source: PLoS One. 2018 Jun 8;13(6):e0198526. doi: 10.1371/journal.pone.0198526 (PMC5993281; doi:10.1371/journal.pone.0198526)
Supplement: S2 Table — The tool identified 1 incomplete, 2 questionable, and 2 complete phages. (XLSX) [file pone.0198526.s002.xlsx]

## Sheet: phages
S2 Table. Phage profile of CFSAN044572 and CFSAN044573 as determined by PHASTER (PHAge Search Tool Enhanced Release- http://phaster.ca). The tool identified 1 incomplete, 2 questionable, and 2 complete phages.
Region	Region Length	Completeness	Score	# Total Proteins	Region Position	Most Common Phage	GC %
MAGC01000018.1 CFSAN044573_25	40.9Kb	intact	150	40	9558-50512	PHAGE_Entero_P88_NC_026014(12)	0.5495
MAGH01000016.1 CFSAN044572_23							0.5496
MAGC01000078.1 CFSAN044573_8	41Kb	intact	150	55	183068-224116	PHAGE_Salmon_118970_sal3_NC_031940(15)	0.5176
MAGH01000056.1 CFSAN044572_6					259216-301843		0.5165
MAGC01000001.1 CFSAN044573_1	48.5Kb	questionable	80	69	359877-408423	PHAGE_Gordon_Bantam_NC_031074(15)	0.5302
MAGH01000001.1 CFSAN044572_1					359877-408423
MAGC01000003.1 CFSAN044573_11	48.2Kb	questionable	90	61	37398-85649	PHAGE_Escher_phiV10_NC_007804(29)	0.5239
MAGH01000076.1 CFSAN044572_8					84190-132441
MAGC01000023.1 CFSAN044573_3	21.7Kb	incomplete	30	9	371663-393397	PHAGE_Entero_P2_NC_001895(3)	0.4874
MAGH01000023.1 CFSAN044572_3					371511-393245
